# Supplementary material for: NAT10 inhibits ferroptosis and promotes the progression of renal clear cell carcinoma by regulating the NFE2L1-GPX4 signaling pathway
Source: PeerJ journal article supplement (doi:10.7717/peerj.20224), 2025-10-31
Supplement: FIGURE1.zip [file fig-1B.xlsx]

## Sheet: Sheet1
	Normal	Tumor
	2.24	35.67
	2.87	54.5
	2.68	32.436
