# Supplementary material for: NAT10 inhibits ferroptosis and promotes the progression of renal clear cell carcinoma by regulating the NFE2L1-GPX4 signaling pathway
Source: PeerJ journal article supplement (doi:10.7717/peerj.20224), 2025-10-31
Supplement: FIGURE1.zip [file fig-1D.xlsx]

## Sheet: Sheet1
		Normal	Tumor
		1	6.87
		1	7.87
		1	7.79
