# Supplementary material for: NAT10 inhibits ferroptosis and promotes the progression of renal clear cell carcinoma by regulating the NFE2L1-GPX4 signaling pathway
Source: PeerJ journal article supplement (doi:10.7717/peerj.20224), 2025-10-31
Supplement: FIGURE1.zip [file fig-1F.xlsx]

## Sheet: Sheet1
		NAT10 negative	NAT10 positive
		1	8.798
		1	11.476
		1	9.68
