# Supplementary material for: NAT10 inhibits ferroptosis and promotes the progression of renal clear cell carcinoma by regulating the NFE2L1-GPX4 signaling pathway
Source: PeerJ journal article supplement (doi:10.7717/peerj.20224), 2025-10-31
Supplement: FIGURE1.zip [file fig-1G.xlsx]

## Sheet: Sheet1
		Time	NAT10 High	NAT10 Low
		12	1
		10	1
		7		1
		8	1
		21		0
		15	1
		7	1
		34	1	0
		21		1
		10		0
		3	1
		7	1
		8	1
		12		0
		3	0
		4		1
		14		0
		18	1	0
		43		0
		28		0
		32		0
		37		0
