# Supplementary material for: NAT10 inhibits ferroptosis and promotes the progression of renal clear cell carcinoma by regulating the NFE2L1-GPX4 signaling pathway
Source: PeerJ journal article supplement (doi:10.7717/peerj.20224), 2025-10-31
Supplement: FIGURE2.zip [file FIG-2A.xlsx]

## Sheet: Sheet1
	HK-2	Caki-1	RCC23	786-O	ACHN
	1	2.234	1.189	2.657	3.89
	1	2.878	1.209	3.08	4.9
	1	2.32	1.254	2.89	4.23
