# Supplementary material for: NAT10 inhibits ferroptosis and promotes the progression of renal clear cell carcinoma by regulating the NFE2L1-GPX4 signaling pathway
Source: PeerJ journal article supplement (doi:10.7717/peerj.20224), 2025-10-31
Supplement: FIGURE2.zip [file FIG-2B.xlsx]

## Sheet: Sheet1
		Control	shNAT10-1	shNAT10-2
		1	0.23	0.436
		1	0.3231	0.412
		1	0.245	0.321
