# Supplementary material for: NAT10 inhibits ferroptosis and promotes the progression of renal clear cell carcinoma by regulating the NFE2L1-GPX4 signaling pathway
Source: PeerJ journal article supplement (doi:10.7717/peerj.20224), 2025-10-31
Supplement: FIGURE2.zip [file FIG-2C.xlsx]

## Sheet: Sheet1
	Control	OE-NAT10-1	OE-NAT10-2
	1	3.23	4.987
	1	3.23	4.34
	1	4.23	4.87
