# Supplementary material for: NAT10 inhibits ferroptosis and promotes the progression of renal clear cell carcinoma by regulating the NFE2L1-GPX4 signaling pathway
Source: PeerJ journal article supplement (doi:10.7717/peerj.20224), 2025-10-31
Supplement: FIGURE2.zip [file FIG-2D.xlsx]

## Sheet: Sheet1
	Hours	Control			shNAT10
	0	0	0	0	0	0	0
	12	0.455	0.476	0.498	0.2312	0.354	0.367
	24	0.7679	0.785	0.699	0.435	0.43	0.408
	48	0.986	1.023	1.089	0.7133	0.675	0.653
