# Supplementary material for: NAT10 inhibits ferroptosis and promotes the progression of renal clear cell carcinoma by regulating the NFE2L1-GPX4 signaling pathway
Source: PeerJ journal article supplement (doi:10.7717/peerj.20224), 2025-10-31
Supplement: FIGURE2.zip [file FIG-2E.xlsx]

## Sheet: Sheet1
		Hours	Control			OE-NAT10
		0	0	0	0	0	0	0
		12	0.355	0.376	0.398	0.4312	0.354	0.467
		24	0.5679	0.585	0.599	0.735	0.73	0.808
		48	0.886	0.798	0.821	0.978	0.975	1.0653
