# Supplementary material for: NAT10 inhibits ferroptosis and promotes the progression of renal clear cell carcinoma by regulating the NFE2L1-GPX4 signaling pathway
Source: PeerJ journal article supplement (doi:10.7717/peerj.20224), 2025-10-31
Supplement: FIGURE2.zip [file FIG-2G.xlsx]

## Sheet: Sheet1
		Control	shNAT10
		11.24	19.78
		15.46	21.35
		10.98	24.57
