# Supplementary material for: NAT10 inhibits ferroptosis and promotes the progression of renal clear cell carcinoma by regulating the NFE2L1-GPX4 signaling pathway
Source: PeerJ journal article supplement (doi:10.7717/peerj.20224), 2025-10-31
Supplement: FIGURE3.zip [file Fig.3A.pdf › FIGURE3/Fig.3A.pdf]

# Volcano Plot of Differential Expression

*EnhancedVolcano*

● NS ●  $\text{Log}_2 \text{FC}$  ● p-value ● p-value and  $\text{log}_2 \text{FC}$

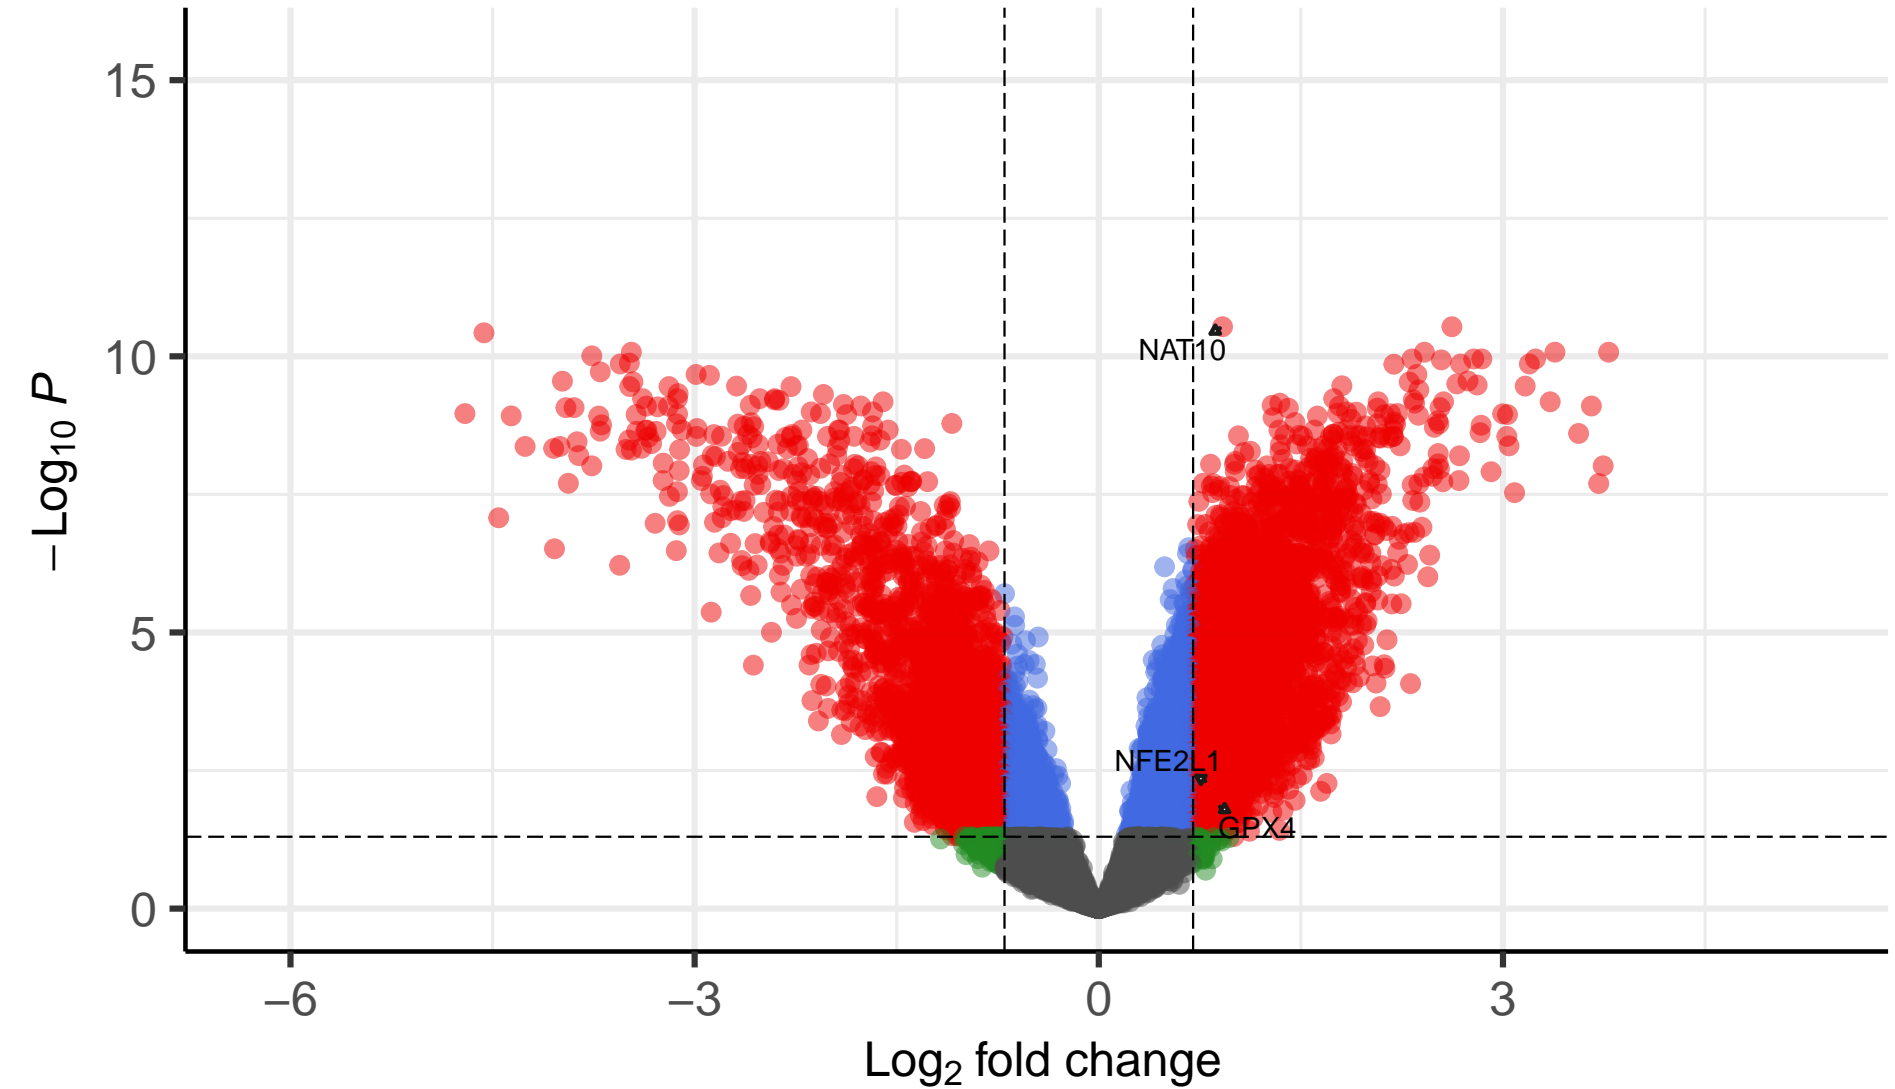

total = 22189 variables
