# Supplementary material for: NAT10 inhibits ferroptosis and promotes the progression of renal clear cell carcinoma by regulating the NFE2L1-GPX4 signaling pathway
Source: PeerJ journal article supplement (doi:10.7717/peerj.20224), 2025-10-31
Supplement: FIGURE4.zip [file FIG-4D.xlsx]

## Sheet: Sheet1
	Normal	Tumor
	1	5.78
	1	4.89
	1	4.12
