# Supplementary material for: NAT10 inhibits ferroptosis and promotes the progression of renal clear cell carcinoma by regulating the NFE2L1-GPX4 signaling pathway
Source: PeerJ journal article supplement (doi:10.7717/peerj.20224), 2025-10-31
Supplement: FIGURE4.zip [file FIG-4H.xlsx]

## Sheet: Sheet1
	Normal	Tumor
	10.79	6.79
	12.46	6.46
	11.68	7.87
