# Supplementary material for: NAT10 inhibits ferroptosis and promotes the progression of renal clear cell carcinoma by regulating the NFE2L1-GPX4 signaling pathway
Source: PeerJ journal article supplement (doi:10.7717/peerj.20224), 2025-10-31
Supplement: FIGURE4.zip [file FIG-4I.xlsx]

## Sheet: Sheet1
		Normal	Tumor
		5.68	12.56
		4.79	11.69
		7.8	10.8
