# Supplementary material for: NAT10 inhibits ferroptosis and promotes the progression of renal clear cell carcinoma by regulating the NFE2L1-GPX4 signaling pathway
Source: PeerJ journal article supplement (doi:10.7717/peerj.20224), 2025-10-31
Supplement: FIGURE4.zip [file FIG-4L.xlsx]

## Sheet: Sheet1
	Control	shNAT10
	2.45	5.34
	2.43	6.4
	2.78	6.87
