# Supplementary material for: NAT10 inhibits ferroptosis and promotes the progression of renal clear cell carcinoma by regulating the NFE2L1-GPX4 signaling pathway
Source: PeerJ journal article supplement (doi:10.7717/peerj.20224), 2025-10-31
Supplement: FIGURE4.zip [file FIG-4M.xlsx]

## Sheet: Sheet1
	Control	OE-NAT10
	2.34	1.12
	1.89	1.32
	1.89	0.98
