# Supplementary material for: NAT10 inhibits ferroptosis and promotes the progression of renal clear cell carcinoma by regulating the NFE2L1-GPX4 signaling pathway
Source: PeerJ journal article supplement (doi:10.7717/peerj.20224), 2025-10-31
Supplement: FIGURE4.zip [file FIG-4O.xlsx]

## Sheet: Sheet1
		Control	shNAT10
		3.23	6.79
		3.57	7.68
		3.98	6.79
