# Supplementary material for: NAT10 inhibits ferroptosis and promotes the progression of renal clear cell carcinoma by regulating the NFE2L1-GPX4 signaling pathway
Source: PeerJ journal article supplement (doi:10.7717/peerj.20224), 2025-10-31
Supplement: FIGURE5.zip [file FIG-5B.xlsx]

## Sheet: Sheet1
			Control			OE-NAT10
		GPX4	1	1	1	6.567	7.68	5.68
		NFE2L1	1	1	1	9.79	10.89	11.68
