# Supplementary material for: NAT10 inhibits ferroptosis and promotes the progression of renal clear cell carcinoma by regulating the NFE2L1-GPX4 signaling pathway
Source: PeerJ journal article supplement (doi:10.7717/peerj.20224), 2025-10-31
Supplement: FIGURE5.zip [file FIG-5F.xlsx]

## Sheet: Sheet1
			Control			shNAT10			OE-NAT10
		GPX4	8.79	10.79	9.89	5.46	5.89	6.68	19.78	20.4	21.57
		NFE2L1	11.57	12.78	11.57	3.57	4.56	5.46	23.46	25.68	26.68
