# Supplementary material for: NAT10 inhibits ferroptosis and promotes the progression of renal clear cell carcinoma by regulating the NFE2L1-GPX4 signaling pathway
Source: PeerJ journal article supplement (doi:10.7717/peerj.20224), 2025-10-31
Supplement: FIGURE5.zip [file Fig.5D.xlsx]

## Sheet: Sheet1
			Control			shNAT10			OE-NAT10
		GPX4	1	1	1	0.765	0.657	0.698	1.824	1.732	1.809
		NFE2L1	1	1	1	0.654	0.467	0.498	1.345	1.367	1.387
