# Supplementary material for: NAT10 inhibits ferroptosis and promotes the progression of renal clear cell carcinoma by regulating the NFE2L1-GPX4 signaling pathway
Source: PeerJ journal article supplement (doi:10.7717/peerj.20224), 2025-10-31
Supplement: FIGURE6.zip [file FIG-6A.xlsx]

## Sheet: Sheet1
	DMSO	HBr	HBr+NFE2L1
	1.09	0.213	0.586
	1.0789	0.32354	0.657
	1.043	0.423	0.945
