# Supplementary material for: NAT10 inhibits ferroptosis and promotes the progression of renal clear cell carcinoma by regulating the NFE2L1-GPX4 signaling pathway
Source: PeerJ journal article supplement (doi:10.7717/peerj.20224), 2025-10-31
Supplement: FIGURE6.zip [file FIG-6B.xlsx]

## Sheet: Sheet1
		DMSO	HBr	HBr+NFE2L1
		1.59	0.547	0.565
		0.786	0.212	0.876
		0.989	0.187	0.8235
