# Supplementary material for: NAT10 inhibits ferroptosis and promotes the progression of renal clear cell carcinoma by regulating the NFE2L1-GPX4 signaling pathway
Source: PeerJ journal article supplement (doi:10.7717/peerj.20224), 2025-10-31
Supplement: FIGURE6.zip [file FIG-6C.xlsx]

## Sheet: Sheet1
		Hours	DMSO			HBr			HBr+NFE2L1
		0	0	0	0	0	0	0	0	0	0
		12	0.405	0.676	0.6098	0.2612	0.3854	0.3967	0.385	0.432	0.487
		24	0.7279	0.7185	0.6499	0.455	0.483	0.4508	0.64567	0.587	0.609
		48	0.986	1.123	0.897	0.8133	0.675	0.553	0.87	0.98	0.769
