# Supplementary material for: NAT10 inhibits ferroptosis and promotes the progression of renal clear cell carcinoma by regulating the NFE2L1-GPX4 signaling pathway
Source: PeerJ journal article supplement (doi:10.7717/peerj.20224), 2025-10-31
Supplement: FIGURE6.zip [file FIG-6D.xlsx]

## Sheet: Sheet1
		Hours	DMSO			HBr			HBr+NFE2L1
		0	0	0	0	0	0	0	0	0	0
		12	0.325	0.5276	0.358	0.2312	0.254	0.2467	0.385	0.432	0.487
		24	0.6679	0.785	0.799	0.435	0.43	0.5408	0.64567	0.587	0.609
		48	0.986	0.998	0.921	0.678	0.775	0.786	0.87	0.98	0.769
