# Supplementary material for: NAT10 inhibits ferroptosis and promotes the progression of renal clear cell carcinoma by regulating the NFE2L1-GPX4 signaling pathway
Source: PeerJ journal article supplement (doi:10.7717/peerj.20224), 2025-10-31
Supplement: FIGURE6.zip [file FIG-6F.xlsx]

## Sheet: Sheet1
		DMSO	HBr	HBr+NFE2L1
		12.7	2.46	8.89
		11.68	3.68	9.79
		18.68	5.68	9.8
