# Supplementary material for: NAT10 inhibits ferroptosis and promotes the progression of renal clear cell carcinoma by regulating the NFE2L1-GPX4 signaling pathway
Source: PeerJ journal article supplement (doi:10.7717/peerj.20224), 2025-10-31
Supplement: FIGURE6.zip [file FIG-6G.xlsx]

## Sheet: Sheet1
		DMSO	HBr	HBr+NFE2L1
		11.78	3.6	7.78
		14.57	2.68	8.09
		13.68	4.68	7.09
