# Supplementary material for: NAT10 inhibits ferroptosis and promotes the progression of renal clear cell carcinoma by regulating the NFE2L1-GPX4 signaling pathway
Source: PeerJ journal article supplement (doi:10.7717/peerj.20224), 2025-10-31
Supplement: FIGURE6.zip [file FIG-6H.xlsx]

## Sheet: Sheet1
			DMSO			HBr			HBr+NFE2L1
		ACHN	2.57	2.809	3.79	7.9	8.79	7.6795	5.658	6.09	5.47
		Caki1	3.79	2.2	2.09	8.87	9.79	6.08	5.796	7.769	4.79
