# Supplementary material for: NAT10 inhibits ferroptosis and promotes the progression of renal clear cell carcinoma by regulating the NFE2L1-GPX4 signaling pathway
Source: PeerJ journal article supplement (doi:10.7717/peerj.20224), 2025-10-31
Supplement: FIGURE6.zip [file FIG-6I.xlsx]

## Sheet: Sheet1
			DMSO			HBr			HBr+NFE2L1
		ACHN	26.09	31.12	32.21	124.68	154.658	169.79	78.8	89.7	88.79
		Caki1	43.98	42	57	154.79	198.79	112.79	79.8	69.8	84.79
