# Supplementary material for: NAT10 inhibits ferroptosis and promotes the progression of renal clear cell carcinoma by regulating the NFE2L1-GPX4 signaling pathway
Source: PeerJ journal article supplement (doi:10.7717/peerj.20224), 2025-10-31
Supplement: FIGURE6.zip [file FIG-6M.xlsx]

## Sheet: Sheet1
			DMSO			HBr			HBr+NFE2L1
		CHAC1	6.06	7.23	7.56	22.57	23.57	21.89	12.57	11.78	13.58
		PTGS2	6.78	8.568	6.68	18.8	17.789	16.79	11.8	13.58	15.57
		SLC7A11	19.68	17.8	20.68	5.68	7.57	8.57	10.34	11.57	12.36
