# Supplementary material for: NAT10 inhibits ferroptosis and promotes the progression of renal clear cell carcinoma by regulating the NFE2L1-GPX4 signaling pathway
Source: PeerJ journal article supplement (doi:10.7717/peerj.20224), 2025-10-31
Supplement: FIGURE7.zip [file Fig.7A.xlsx]

## Sheet: Sheet1
				Vec-Ctrl + DMSO			Vec-Ctrl + RSL3			NAT10-OE + DMSO			NAT10-OE + RSL3
			GPX4	0.959264	0.993092	1.04247	0.473029	0.389582	0.34151	3.07375	2.86791	2.82843	1.05702	1.01396	0.965936
			ACSL4	1.04972	1	0.959264	1.75321	1.91853	1.87905	0.712025	0.784584	0.858565	1.3566	1.25701	1.18921
			SLC7A11	0.97942	1	1.02101	0.238159	0.231647	0.295248	2.2974	2.44528	2.44528	0.607097	0.521233	0.482968
