# Supplementary material for: NAT10 inhibits ferroptosis and promotes the progression of renal clear cell carcinoma by regulating the NFE2L1-GPX4 signaling pathway
Source: PeerJ journal article supplement (doi:10.7717/peerj.20224), 2025-10-31
Supplement: FIGURE7.zip [file Fig.7C.xlsx]

## Sheet: Sheet1
				Vec-Ctrl + DMSO			Vec-Ctrl + RSL3			NAT10-OE + DMSO			NAT10-OE + RSL3
			GPX4	0.816148	0.822805	0.807589	0.356687	0.382502	0.336255	0.980963	0.934675	1.00637	0.658842	0.655385	0.590764
			ACSL4	0.306656	0.306051	0.316166	0.911529	0.887591	0.922903	0.0612939	0.0671925	0.066022	0.633905	0.650239	0.573493
			SLC7A11	0.694825	0.693623	0.717711	0.198689	0.215145	0.213735	0.950784	0.960585	0.931699	0.549322	0.557141	0.483044
