# Supplementary material for: NAT10 inhibits ferroptosis and promotes the progression of renal clear cell carcinoma by regulating the NFE2L1-GPX4 signaling pathway
Source: PeerJ journal article supplement (doi:10.7717/peerj.20224), 2025-10-31
Supplement: FIGURE7.zip [file Fig.7D.xlsx]

## Sheet: Sheet1
				Vec-Ctrl + DMSO					Vec-Ctrl + RSL3					NAT10-OE + DMSO					NAT10-OE + RLS3
			24h	123.888	129.09	121.971	134.018	126.694	74.9591	72.5041	63.066	66.0666	75.6683	137.179	147.047	140.653	132.801	142.599	94.0369	94.4063	92.4011	100	102.639
			48h	143.121	150.787	152.567	157.906	155.784	55.7556	52.3186	59.3562	49.4272	46.2084	175.4	177.206	166.713	164.976	174.149	81.9525	82.9024	88.1794	84.0106	77.7309
			72h	173.443	176.797	168.994	180.287	181.383	32.1331	33.9334	35.7883	42.3895	38.4615	233.426	226.685	230.994	234.121	241.557	68.6016	74.8813	69.4987	65.3298	61.6887
			96h
			120h	188.227	194.798	191.65	202.669	210.541	22.7496	18.2215	25.3682	24.2226	19.5308	262.821	261.015	258.304	251.564	261.918	51.2401	62.6385	53.1926	58.3113	48.496
