# Supplementary material for: NAT10 inhibits ferroptosis and promotes the progression of renal clear cell carcinoma by regulating the NFE2L1-GPX4 signaling pathway
Source: PeerJ journal article supplement (doi:10.7717/peerj.20224), 2025-10-31
Supplement: FIGURE7.zip [file Fig.7E.xlsx]

## Sheet: Sheet1
				Vec-Ctrl + DMSO	Vec-Ctrl + RSL3	NAT10-OE + DMSO	NAT10-OE + RSL3
				2.24152	6.18913	1.41763	4.8628
				1.83001	6.41359	1.30421	5.03953
				2.07439	7.064	1.50994	4.97374
