# Supplementary figures and images for: NAT10 inhibits ferroptosis and promotes the progression of renal clear cell carcinoma by regulating the NFE2L1-GPX4 signaling pathway
Source: PeerJ journal article supplement (doi:10.7717/peerj.20224), 2025-10-31

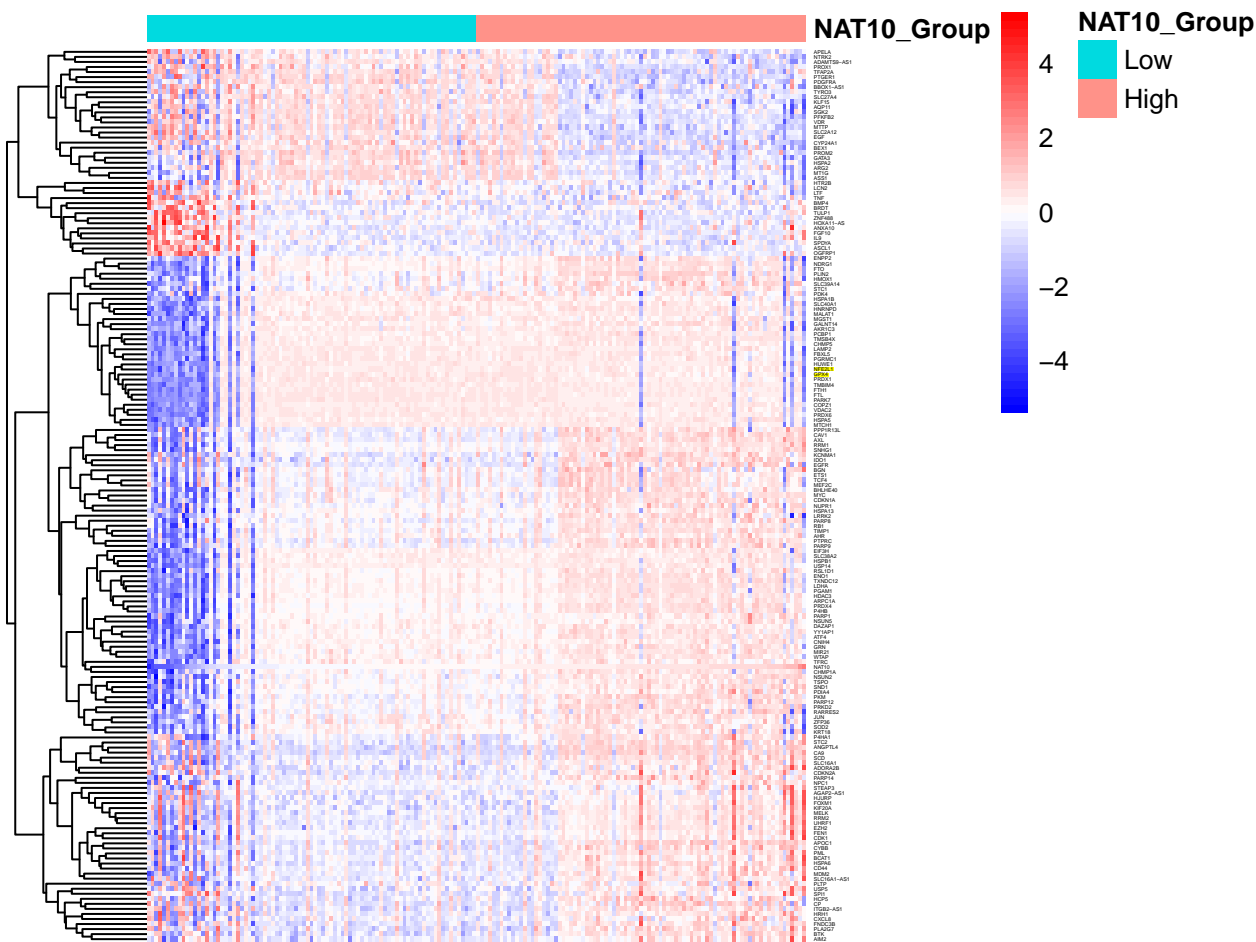

Supplement: FIGURE3.zip [file Fig.3B.pdf › FIGURE3/Fig.3B.pdf]

# KEGG Pathway Enrichment

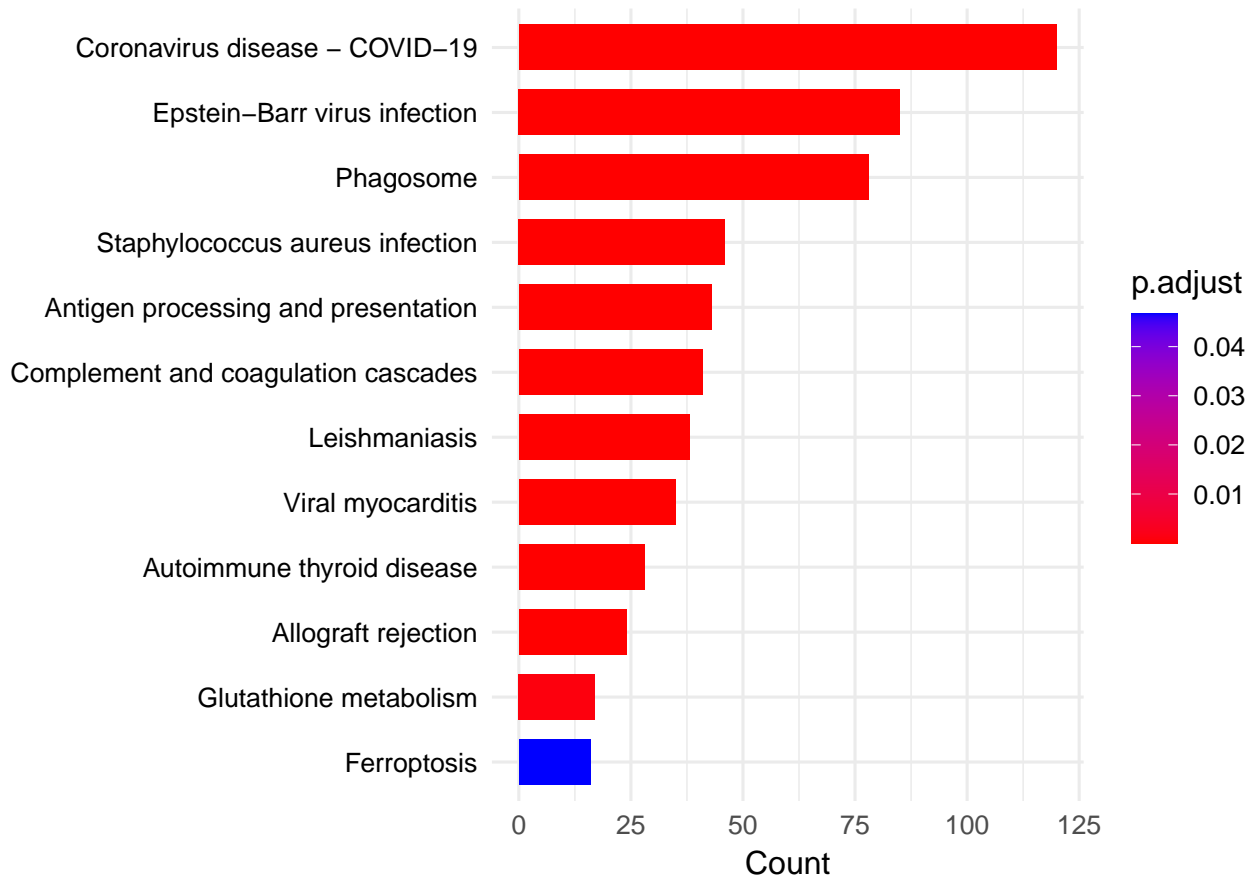

Supplement: FIGURE3.zip [file Fig.3C.pdf › FIGURE3/Fig.3C.pdf]
